# Supplementary material
Source: PubMed Central journal article supplement (PMC4999924)
Supplement: JB.00324-16_zjb999094176so1.pdf [file JB.00324-16_zjb999094176so1.pdf]

1

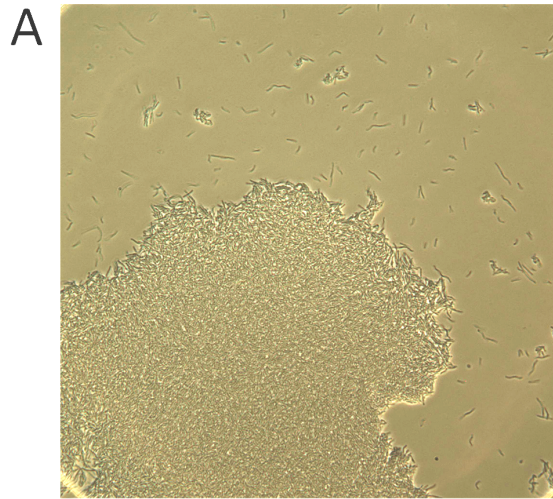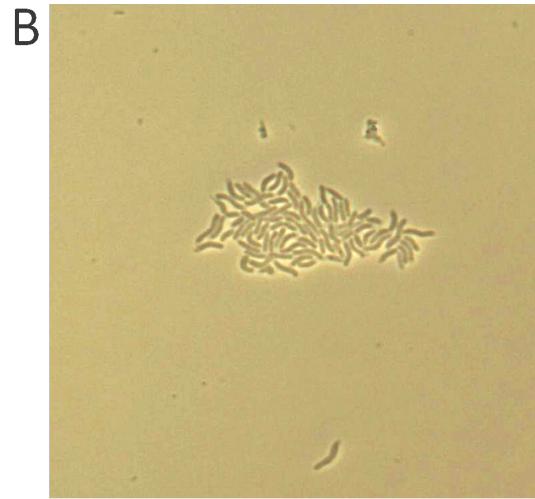

2

3 **Supplemental Figure 1.**

4 Phase contrast images of the  $\Delta arsS$  mutant strain were taken after 72 hours of

5 growth. **A.** 40X magnification and **B.** 100x oil emersion.

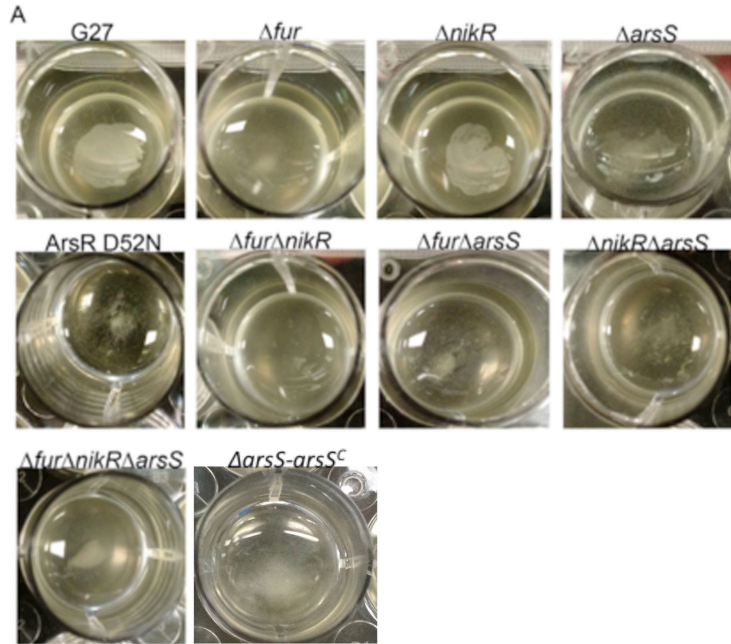

**B**

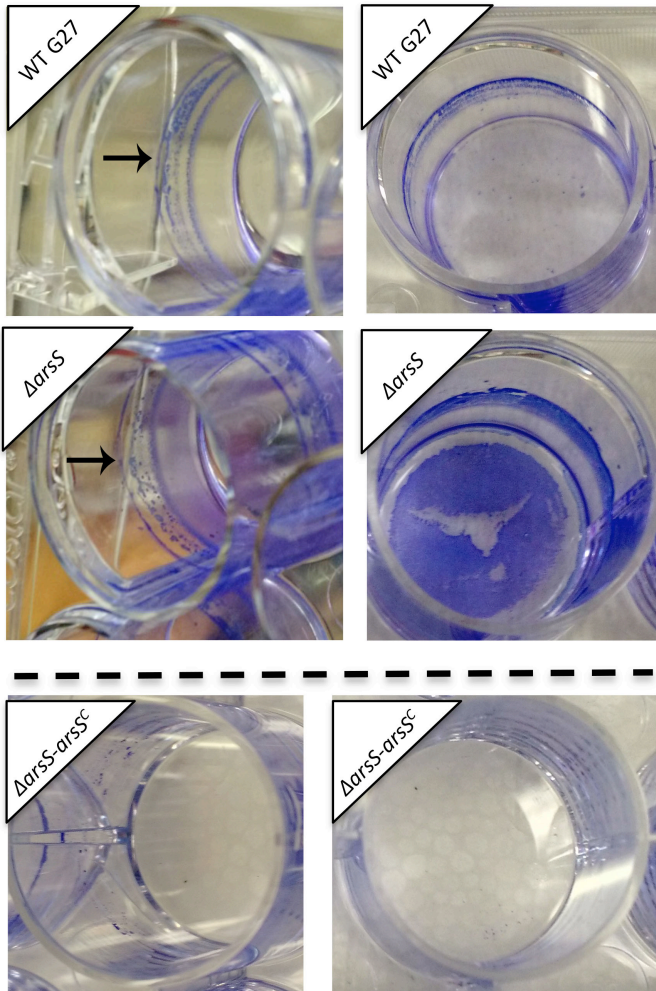

7 **Supplemental Figure 2.**

8 **A.** Representative images of the various biofilm phenotypes observed after 72

9 hours of growth in 24 well plates. The strains grown in each well are labeled.

10 Wild-type G27 and  $\Delta nikR$  both exhibit pellicle formation in addition to biofilm

11 formation at the air-liquid interface,  $\Delta fur$  and  $\Delta fur\Delta nikR$  display biofilm

12 formation only at the air-liquid interface, and strains lacking  $\Delta arsS$  or

13 containing the *ArsR*-D52N mutation appear granular due to auto-aggregation

14 and form biofilm at the air-liquid interface and on the bottom of the well. The

15  $\Delta arsS-arsS^C$  exhibited slight biofilm formation at the liquid-air interface as well

16 as minimal aggregation.

17 **B.** Representative images of G27 and the  $\Delta arsS$  strain after crystal violet staining

18 of 72 hour cultures. Both strains show prominent staining at the air-liquid

19 interface; however, the  $\Delta arsS$  mutant strain also shows significant staining

20 along the side and bottom of the well (arrow). Below the dashed line are

21 representative images from the  $\Delta arsS-arsS^C$  biofilm assays; complementation

22 resulted in a loss of the hyper-biofilm phenotype.

23

24

25

Table S1. Comparison of the degree of biofilm formation at each time point

| T24                                                                             | Adjusted P Value <sup>#</sup> | Summary            |
|---------------------------------------------------------------------------------|-------------------------------|--------------------|
| G27 vs. G27 $\Delta$ arsS                                                       | 0.0008                        | ** <sub>1</sub> ,A |
| G27 vs. G27 $\Delta$ fur $\Delta$ arsS                                          | 0.0231                        | ** <sub>1</sub> ,A |
| G27 vs. G27 $\Delta$ nikR $\Delta$ arsS                                         | 0.005                         | * <sub>1</sub> ,A  |
| G27 vs. G27 $\Delta$ fur $\Delta$ nikR $\Delta$ arsS                            | 0.004                         | ***                |
| G27 $\Delta$ fur vs. G27 $\Delta$ arsS                                          | 0.002                         | ***                |
| G27 $\Delta$ fur vs. G27 $\Delta$ fur $\Delta$ arsS                             | 0.0447                        | ***                |
| G27 $\Delta$ fur vs. G27 $\Delta$ nikR $\Delta$ arsS                            | 0.0107                        | ** <sub>1</sub> ,A |
| G27 $\Delta$ fur vs. G27 $\Delta$ fur $\Delta$ nikR $\Delta$ arsS               | 0.0086                        | ***                |
| G27 $\Delta$ nikR vs. G27 $\Delta$ arsS                                         | 0.0003                        | ***                |
| G27 $\Delta$ nikR vs. G27 $\Delta$ fur $\Delta$ arsS                            | 0.0091                        | ***                |
| G27 $\Delta$ nikR vs. G27 $\Delta$ nikR $\Delta$ arsS                           | 0.0018                        | ** <sub>1</sub> ,A |
| G27 $\Delta$ nikR vs. G27 $\Delta$ fur $\Delta$ nikR $\Delta$ arsS              | 0.0014                        | ***                |
| G27 $\Delta$ fur $\Delta$ nikR vs. G27 $\Delta$ arsS                            | 0.0005                        | ***                |
| G27 $\Delta$ fur $\Delta$ nikR vs. G27 $\Delta$ fur $\Delta$ arsS               | 0.0144                        | ***                |
| G27 $\Delta$ fur $\Delta$ nikR vs. G27 $\Delta$ nikR $\Delta$ arsS              | 0.003                         | ** <sub>1</sub> ,A |
| G27 $\Delta$ fur $\Delta$ nikR vs. G27 $\Delta$ fur $\Delta$ nikR $\Delta$ arsS | 0.0023                        | ***                |
| 48                                                                              | Adjusted P Value <sup>#</sup> | Summary            |
| G27 vs. G27 $\Delta$ arsS                                                       | < 0.0001                      | ** <sub>1</sub> ,A |
| G27 vs. G27 $\Delta$ fur $\Delta$ arsS                                          | 0.0001                        | ** <sub>1</sub> ,A |
| G27 vs. G27 $\Delta$ fur $\Delta$ nikR $\Delta$ arsS                            | 0.0004                        | ***                |
| G27 vs. ArsR D52N                                                               | < 0.0001                      | ** <sub>1</sub> ,B |
| G27 $\Delta$ fur vs. G27 $\Delta$ arsS                                          | < 0.0001                      | ***                |
| G27 $\Delta$ fur vs. G27 $\Delta$ fur $\Delta$ arsS                             | < 0.0001                      | ***                |
| G27 $\Delta$ fur vs. G27 $\Delta$ nikR $\Delta$ arsS                            | 0.0366                        | ** <sub>1</sub> ,A |
| G27 $\Delta$ fur vs. G27 $\Delta$ fur $\Delta$ nikR $\Delta$ arsS               | 0.0001                        | ***                |
| G27 $\Delta$ fur vs. ArsR D52N                                                  | < 0.0001                      | ** <sub>1</sub> ,B |
| G27 $\Delta$ nikR vs. G27 $\Delta$ arsS                                         | < 0.0001                      | ***                |
| G27 $\Delta$ nikR vs. G27 $\Delta$ fur $\Delta$ arsS                            | < 0.0001                      | ***                |
| G27 $\Delta$ nikR vs. G27 $\Delta$ nikR $\Delta$ arsS                           | 0.0017                        | ** <sub>1</sub> ,A |
| G27 $\Delta$ nikR vs. G27 $\Delta$ fur $\Delta$ nikR $\Delta$ arsS              | < 0.0001                      | ***                |
| G27 $\Delta$ nikR vs. ArsR D52N                                                 | < 0.0001                      | ** <sub>1</sub> ,B |
| G27 $\Delta$ fur $\Delta$ nikR vs. G27 $\Delta$ arsS                            | < 0.0001                      | ***                |
| G27 $\Delta$ fur $\Delta$ nikR vs. G27 $\Delta$ fur $\Delta$ arsS               | < 0.0001                      | ***                |
| G27 $\Delta$ fur $\Delta$ nikR vs. G27 $\Delta$ nikR $\Delta$ arsS              | 0.0149                        | ** <sub>1</sub> ,A |
| G27 $\Delta$ fur $\Delta$ nikR vs. G27 $\Delta$ fur $\Delta$ nikR $\Delta$ arsS | < 0.0001                      | ***                |
| G27 $\Delta$ fur $\Delta$ nikR vs. ArsR D52N                                    | < 0.0001                      | ** <sub>1</sub> ,B |
| 72                                                                              | Adjusted P Value <sup>#</sup> | Summary            |
| G27 vs. G27 $\Delta$ fur $\Delta$ nikR $\Delta$ arsS                            | 0.0162                        | ***                |

|                                                                                  |          |                  |
|----------------------------------------------------------------------------------|----------|------------------|
| G27 vs. ArsR D52N                                                                | 0.0199   | ** <sup>,B</sup> |
| G27 $\Delta$ fur vs. G27 $\Delta$ arsS                                           | 0.0024   | ***              |
| G27 $\Delta$ fur vs. G27 $\Delta$ fur $\Delta$ arsS                              | 0.0115   | ***              |
| G27 $\Delta$ fur vs. G27 $\Delta$ fur $\Delta$ nikR $\Delta$ arsS                | 0.0005   | ***              |
| G27 $\Delta$ fur vs. ArsR D52N                                                   | 0.0006   | ** <sup>,B</sup> |
| G27 $\Delta$ nikR vs. G27 $\Delta$ arsS                                          | 0.0016   | ***              |
| G27 $\Delta$ nikR vs. G27 $\Delta$ fur $\Delta$ arsS                             | 0.008    | ***              |
| G27 $\Delta$ nikR vs. G27 $\Delta$ fur $\Delta$ nikR $\Delta$ arsS               | 0.0003   | ***              |
| G27 $\Delta$ nikR vs. ArsR D52N                                                  | 0.0004   | ** <sup>,B</sup> |
| G27 $\Delta$ fur $\Delta$ nikR vs. G27 $\Delta$ arsS                             | 0.0004   | ***              |
| G27 $\Delta$ fur $\Delta$ nikR vs. G27 $\Delta$ fur $\Delta$ arsS                | 0.002    | ***              |
| G27 $\Delta$ fur $\Delta$ nikR vs. G27 $\Delta$ fur $\Delta$ nikR $\Delta$ arsS  | < 0.0001 | ***              |
| G27 $\Delta$ fur $\Delta$ nikR vs. ArsR D52N                                     | < 0.0001 | ** <sup>,B</sup> |
| G27 $\Delta$ nikR $\Delta$ arsS vs. G27 $\Delta$ fur $\Delta$ nikR $\Delta$ arsS | 0.0417   | * <sup>,B</sup>  |

# 2-way ANOVA with Tukey's multiple comparisons test

\*<sup>,A</sup> significant 24 hours

\*<sup>,B</sup> significant at 72 hours

\*\*<sup>,A</sup> significant at 24 and 48 hours

\*\*<sup>,B</sup> significant at 48 and 72 hours

\*\*\* significant 24, 48, and 72 hours
